# Supplementary material for: Coordination chemogenetics for activation of GPCR-type glutamate receptors in brain tissue
Source: PubMed Central journal article supplement (PMC9203742; doi:10.1038/s41467-022-30828-0), 2022-06-16
Supplement: 41467_2022_30828_MOESM3_ESM.pdf [file 41467_2022_30828_MOESM3_ESM.pdf]

### Description of Additional Supplementary Files

**Supplementary Movie 1:** *mGlu1<sup>CBC/CBC</sup>* mice do not show the ataxic phenotype observed in *mGlu1<sup>-/-</sup>* mice.
